# Supplementary material
Source: publisher site journal article supplement (https://www.spandidos-publications.com/5569/downloadSupplementary)

Figure S1. BI2536 activates ATM-ERK signaling in human adrenocortical H295R cells. (A) BI2536 induces centrosome amplification. Quantitative results of cells with multiple centrosomes in the absence (CTL) or presence of BI2536. The results are presented as the mean  $\pm$  SD from three independent experiments; >100 cells were counted in each individual group. (B) ATM was activated by BI2536. Cell extracts of CTL or BI2536-treated cells were analyzed by western blotting with antibodies against ATM, p-ATM and p150. (C) ERK was activated by BI2536. Cell extracts of CTL or BI2536-treated cells were analyzed by western blotting with antibodies against ERK, p-ERK and actin. (D) ERK is activated by ATM upon BI2536 treatment. Cell extracts of CTL or BI2536-treated cells in the presence or absence of Ku55933 were analyzed by western blotting with antibodies against ATM, ATM serine/threonine kinase, p-ATM, ERK, p-ERK and p150. \*\*\* $P$ <0.001. CTL, control; p-, phosphorylated.

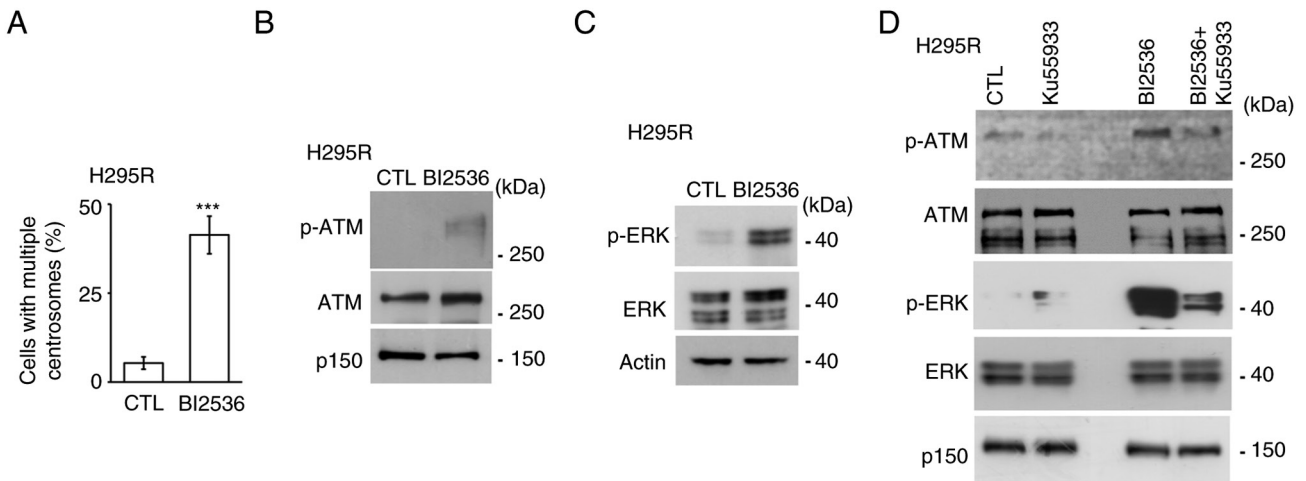

Supplement: Supplementary file 1 [file downloadSupplementary]
